# Supplementary material for: Larval exposure to field-realistic concentrations of clothianidin has no effect on development rate, over-winter survival or adult metabolic rate in a solitary bee, Osmia bicornis
Source: PubMed Central journal article supplement (PMC5480390; doi:10.7717/peerj.3417), 2017-06-20
Supplement: peerj-05-3417-s001.pdf [file peerj-05-3417-s001.pdf]

| Chemical   | MDL<br><i>ng/g ww</i> | MQL  | Recovery<br>(1.2 ppb ww) |           |
|------------|-----------------------|------|--------------------------|-----------|
|            |                       |      | <i>Mean %</i>            | <i>SD</i> |
| <b>TMX</b> | 0.12                  | 0.36 | 95                       | 3         |
| <b>CLO</b> | 0.12                  | 0.36 | 93                       | 14        |
| <b>IMC</b> | 0.16                  | 0.48 | 92                       | 18        |
| <b>ACT</b> | 0.04                  | 0.12 | 83                       | 15        |
| <b>THC</b> | 0.04                  | 0.12 | 93                       | 8         |
