# Supplementary material for: Larval exposure to field-realistic concentrations of clothianidin has no effect on development rate, over-winter survival or adult metabolic rate in a solitary bee, Osmia bicornis
Source: PubMed Central journal article supplement (PMC5480390; doi:10.7717/peerj.3417), 2017-06-20
Supplement: peerj-05-3417-s002.pdf [file peerj-05-3417-s002.pdf]

| <b>CLO (ppb)</b> | <b>Sex</b> | <b>Provision Weight (mg)</b> | <b>Larval Weight (mg)</b> | <b>Pupal Weight (mg)</b> | <b>Adult Weight (mg)</b> |
|------------------|------------|------------------------------|---------------------------|--------------------------|--------------------------|
| 0                | Female     | 335.54 ±49.99                | 150.86 ±14.68             | 129.32 ±20.34            | 68.57 ±14.93             |
| 1                |            | 337.84 ±44.80                | 162.77 ±24.70             | 139.78 ±18.59            | 79.55 ±10.74             |
| 3                |            | 334.45 ±77.15                | 152.09 ±32.20             | 131.87 ±28.67            | 73.81 ±16.85             |
| 10               |            | 324.79 ±58.38                | 152.69 ±26.79             | 129.19 ±23.01            | 72.92 ±12.50             |
| 0                | Male       | 205.95 ±26.17                | 101.14 ±14.08             | 89.59 ±14.31             | 47.45 ±7.69              |
| 1                |            | 239.69 ±39.60                | 112.41 ±23.24             | 94.22 ±11.84             | 47.79 ±9.65              |
| 3                |            | 225.61 ±25.57                | 109.21 ±16.55             | 94.58 ±13.86             | 47.69 ±8.98              |
| 10               |            | 218.55 ±18.90                | 99.41 ±20.34              | 88.56 ±16.22             | 45.97 ±7.65              |
