# Supplementary material for: Larval exposure to field-realistic concentrations of clothianidin has no effect on development rate, over-winter survival or adult metabolic rate in a solitary bee, Osmia bicornis
Source: PubMed Central journal article supplement (PMC5480390; doi:10.7717/peerj.3417), 2017-06-20
Supplement: peerj-05-3417-s003.pdf [file peerj-05-3417-s003.pdf]

| <b>CLO<br/>(ppb)</b> | <b>Male</b>     |              | <b>Female</b>   |              |
|----------------------|-----------------|--------------|-----------------|--------------|
|                      | <i>Mean ±SE</i> | <i>Range</i> | <i>Mean ±SE</i> | <i>Range</i> |
| <b>0</b>             | 7.00 ±1.34      | 4-14         | 14.85 ±1.01     | 6-24         |
| <b>1</b>             | 6.21 ±1.01      | 2-13         | 15.83 ±1.10     | 7-26         |
| <b>3</b>             | 5.93 ±0.98      | 1-10         | 15.06 ±0.95     | 7-24         |
| <b>10</b>            | 5.27 ±0.98      | 1-11         | 16.34 ±1.01     | 8-24         |
