# Supplementary material for: Larval exposure to field-realistic concentrations of clothianidin has no effect on development rate, over-winter survival or adult metabolic rate in a solitary bee, Osmia bicornis
Source: PubMed Central journal article supplement (PMC5480390; doi:10.7717/peerj.3417), 2017-06-20
Supplement: peerj-05-3417-s004.pdf [file peerj-05-3417-s004.pdf]

| <b>Treatment<br/>(ppb CLO)</b> | <b>Continuous</b> |           | <b>Discontinuous</b> |           |
|--------------------------------|-------------------|-----------|----------------------|-----------|
|                                | Male              | Female    | Male                 | Female    |
| <b>0</b>                       | 1                 | 6         | 8                    | 8         |
| <b>1</b>                       | 3                 | 3         | 9                    | 8         |
| <b>3</b>                       | 2                 | 6         | 12                   | 10        |
| <b>10</b>                      | 1                 | 2         | 12                   | 11        |
| <b>TOTAL</b>                   | <b>7</b>          | <b>17</b> | <b>41</b>            | <b>37</b> |
